# Supplementary material for: DOF AFFECTING GERMINATION 2 is a positive regulator of light-mediated seed germination and is repressed by DOF AFFECTING GERMINATION 1
Source: PubMed Central journal article supplement (PMC4355143; doi:10.1186/s12870-015-0453-1), 2015-03-04

*WS*

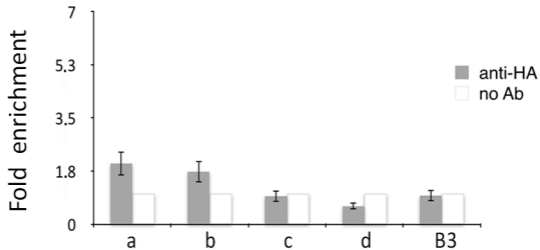

Supplement: 12870_2015_453_MOESM1_ESM.pdf [file 12870_2015_453_MOESM1_ESM.pdf]
